# Supplementary material for: Air-Dried Brown Seaweed, Ascophyllum nodosum, Alters the Rumen Microbiome in a Manner That Changes Rumen Fermentation Profiles and Lowers the Prevalence of Foodborne Pathogens
Source: PubMed Central journal article supplement (PMC5793039; doi:10.1128/msphere.00017-18), 2018-01-31
Supplement: sph001182470sf2.pdf [file sph001182470sf2.pdf]

|                                 | Acetic | Propionic | Isobutyric | Butyric | Isovaleric | Valeric | Caproic | Acetic:<br>Propionic | NH <sub>3</sub> -N |
|---------------------------------|--------|-----------|------------|---------|------------|---------|---------|----------------------|--------------------|
| Undefined sp. of Vellonellaceae |        |           |            |         |            |         | 0.314   |                      |                    |
| <i>Prevotella copri</i>         |        |           |            |         |            | 0.308   |         |                      |                    |
| <i>Roseburia</i> sp.            |        | 0.312     |            |         |            |         |         |                      |                    |
| <i>Blautia producta</i>         |        |           |            |         |            | 0.348   |         |                      |                    |
| <i>Entodinium</i> sp. 1         | 0.429  |           |            |         |            |         |         | 0.387                | 0.498              |
| <i>Polyplastron</i> sp.         | 0.489  |           |            |         |            |         |         | 0.461                | 0.550              |
| <i>Isotricha</i> sp. 1          | 0.329  |           |            |         |            |         |         | 0.357                | 0.310              |
| <i>Isotricha</i> sp. 2          |        | 0.428     |            |         |            | 0.538   |         |                      |                    |
