# Supplementary material for: Air-Dried Brown Seaweed, Ascophyllum nodosum, Alters the Rumen Microbiome in a Manner That Changes Rumen Fermentation Profiles and Lowers the Prevalence of Foodborne Pathogens
Source: PubMed Central journal article supplement (PMC5793039; doi:10.1128/msphere.00017-18), 2018-01-31

|                | acetic | propionic | isobutyric | butyric | isovaleric | valeric | caproic |
|----------------|--------|-----------|------------|---------|------------|---------|---------|
| Acidobacteria  | 0.084  | 0.350     | 0.610      | 0.255   | 0.577      | 0.129   | 0.058   |
| Actinobacteria | 0.419  | 0.885     | 0.380      | 0.488   | 0.209      | 0.722   | 0.365   |
| Bacteroidetes  | 0.009  | <0.001    | 0.407      | 0.121   | 0.923      | 0.068   | 0.108   |
| Chloroflexi    | 0.011  | 0.001     | 0.744      | 0.186   | 0.729      | 0.012   | 0.962   |
| Cyanobacteria  | 0.679  | 0.189     | 0.402      | 0.276   | 0.302      | 0.325   | 0.954   |
| Fibrobacteres  | 0.213  | <0.001    | 0.026      | 0.002   | 0.992      | 0.001   | 0.435   |
| Firmicutes     | <0.001 | <0.001    | 0.870      | 0.106   | 0.302      | 0.027   | 0.067   |
| Proteobacteria | 0.004  | <0.001    | 0.658      | 0.251   | <0.001     | 0.031   | 0.316   |
| Spirochaetes   | 0.707  | <0.001    | <0.001     | <0.001  | 0.092      | <0.001  | 0.293   |
| Synergistetes  | 0.977  | 0.375     | 0.345      | 0.386   | 0.603      | 0.470   | 0.311   |
| TM7            | 0.476  | 0.321     | 0.019      | 0.070   | 0.167      | 0.370   | 0.531   |
| Tenericutes    | 0.018  | 0.992     | 0.155      | 0.024   | 0.150      | 0.350   | 0.597   |

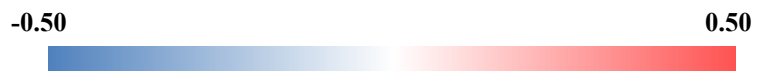

Supplement: sph001182470sf3.pdf [file sph001182470sf3.pdf]
