# Supplementary material for: Air-Dried Brown Seaweed, Ascophyllum nodosum, Alters the Rumen Microbiome in a Manner That Changes Rumen Fermentation Profiles and Lowers the Prevalence of Foodborne Pathogens
Source: PubMed Central journal article supplement (PMC5793039; doi:10.1128/msphere.00017-18), 2018-01-31
Supplement: sph001182470sf4.pdf [file sph001182470sf4.pdf]

| Rumen    |         |                  |     |      |      |           |      |      | Feces     |     |      |      |      |      |      |
|----------|---------|------------------|-----|------|------|-----------|------|------|-----------|-----|------|------|------|------|------|
| BASELINE |         | 07-January-2014  |     |      |      | serogroup |      |      | serogroup |     |      |      |      |      |      |
| Ram      | Diet    | O26              | O45 | O103 | O111 | O121      | O145 | O157 | O26       | O45 | O103 | O111 | O121 | O145 | O157 |
| 1        | control |                  |     |      | ++   | ++        |      |      |           |     |      | ++   |      |      |      |
| 2        | control |                  | ++  | ++   |      |           |      |      |           | ++  | ++   |      | ++   |      | ++   |
| 3        | control |                  |     |      |      |           | ++   |      |           |     |      | ++   |      |      |      |
| 4        | control | ++               |     |      | ++   |           |      | ++   | ++        |     |      |      |      |      |      |
| 5        | control |                  | ++  |      |      |           |      | ++   | ++        |     |      | ++   | ++   |      |      |
| 6        | control |                  |     | ++   |      |           |      |      | ++        |     |      | ++   | ++   |      |      |
| 7        | control |                  |     | ++   |      | ++        | ++   | ++   |           |     |      |      | ++   |      |      |
| 8        | control |                  |     | ++   |      |           | ++   | ++   | ++        |     |      | ++   | ++   | ++   |      |
| PERIOD 1 |         | 28-January-2014  |     |      |      | serogroup |      |      | serogroup |     |      |      |      |      |      |
| Ram      | Diet    | O26              | O45 | O103 | O111 | O121      | O145 | O157 | O26       | O45 | O103 | O111 | O121 | O145 | O157 |
| 1        | control |                  |     |      |      |           | ++   | ++   |           |     |      | ++   | ++   |      |      |
| 2        | 1%-SW   |                  |     |      |      |           |      | ++   |           |     |      |      |      |      |      |
| 3        | 5%-SW   |                  |     |      |      |           |      |      |           |     |      |      |      |      |      |
| 4        | 1%-SW   |                  |     |      | ++   |           |      | ++   | ++        | ++  |      | ++   |      |      |      |
| 5        | 3%-SW   |                  |     | ++   | ++   |           |      | ++   |           |     |      |      |      |      |      |
| 6        | 3%-SW   |                  |     |      | ++   |           |      |      |           |     |      |      |      |      |      |
| 7        | control |                  |     | ++   |      |           |      | ++   |           |     |      |      |      |      |      |
| 8        | 5%-SW   |                  |     | ++   | ++   |           |      |      |           |     |      |      |      |      |      |
| PERIOD 2 |         | 18-February-2014 |     |      |      | serogroup |      |      | serogroup |     |      |      |      |      |      |
| Ram      | Diet    | O26              | O45 | O103 | O111 | O121      | O145 | O157 | O26       | O45 | O103 | O111 | O121 | O145 | O157 |
| 1        | 1%-SW   |                  | ++  |      |      |           |      | ++   |           |     |      |      |      |      |      |
| 2        | 5%-SW   |                  |     |      |      |           |      |      |           |     |      |      |      |      |      |
| 3        | 3%-SW   |                  |     |      |      |           |      | ++   |           |     |      |      |      |      |      |
| 4        | 5%-SW   |                  |     |      |      |           |      |      |           |     |      |      |      |      |      |
| 5        | control |                  |     | ++   |      |           |      |      |           |     |      |      |      |      |      |
| 6        | control |                  |     |      |      |           |      | ++   |           |     |      |      |      |      |      |
| 7        | 1%-SW   |                  |     |      |      | ++        |      |      |           |     |      |      |      |      |      |
| 8        | 3%-SW   |                  | ++  | ++   |      |           |      | ++   |           |     |      |      |      |      |      |
| PERIOD 3 |         | 11-March-2014    |     |      |      | serogroup |      |      | serogroup |     |      |      |      |      |      |
| Ram      | Diet    | O26              | O45 | O103 | O111 | O121      | O145 | O157 | O26       | O45 | O103 | O111 | O121 | O145 | O157 |
| 1        | 3%-SW   |                  | ++  |      |      |           |      | ++   |           |     |      |      |      |      |      |
| 2        | control | ++               | ++  | ++   | ++   |           |      |      |           | ++  |      |      |      |      |      |
| 3        | 1%-SW   |                  | ++  | ++   | ++   | ++        |      | ++   |           |     |      |      |      |      |      |
| 4        | control |                  | ++  |      |      | ++        |      | ++   |           | ++  |      |      |      |      |      |
| 5        | 5%-SW   |                  | ++  | ++   | ++   | ++        |      | ++   |           |     |      |      |      |      |      |
| 6        | 5%-SW   | ++               | ++  |      | ++   | ++        |      | ++   | ++        |     |      |      |      |      |      |
| 7        | 3%-SW   |                  | ++  | ++   |      | ++        |      | ++   |           |     |      |      |      |      |      |
| 8        | 1%-SW   |                  | ++  |      |      |           |      | ++   | ++        |     | ++   |      |      |      |      |
| PERIOD 4 |         | 01-April-2014    |     |      |      | serogroup |      |      | serogroup |     |      |      |      |      |      |
| Ram      | Diet    | O26              | O45 | O103 | O111 | O121      | O145 | O157 | O26       | O45 | O103 | O111 | O121 | O145 | O157 |
| 1        | 5%-SW   |                  | ++  | ++   |      |           | ++   | ++   |           |     |      |      |      |      |      |
| 2        | 3%-SW   |                  | ++  | ++   | ++   |           | ++   | ++   |           |     |      |      |      |      |      |
| 3        | control |                  |     |      | ++   |           | ++   | ++   |           |     |      |      |      |      |      |
| 4        | 3%-SW   |                  |     | ++   | ++   |           |      | ++   |           |     |      |      |      |      |      |
| 5        | 1%-SW   |                  |     |      |      |           | ++   | ++   |           |     |      |      | ++   |      |      |
| 6        | 1%-SW   |                  |     |      | ++   |           | ++   | ++   |           |     |      |      |      |      |      |
| 7        | 5%-SW   |                  |     |      |      |           |      | ++   |           |     |      |      |      |      |      |
| 8        | control |                  | ++  |      |      |           | ++   | ++   |           | ++  | ++   |      | ++   |      |      |
