# Supplementary material for: Air-Dried Brown Seaweed, Ascophyllum nodosum, Alters the Rumen Microbiome in a Manner That Changes Rumen Fermentation Profiles and Lowers the Prevalence of Foodborne Pathogens
Source: PubMed Central journal article supplement (PMC5793039; doi:10.1128/msphere.00017-18), 2018-01-31
Supplement: sph001182470st1.pdf [file sph001182470st1.pdf]

Table S1

| Proportion     | Diets                  |                         |                         |                        | Linear | Quadratic |
|----------------|------------------------|-------------------------|-------------------------|------------------------|--------|-----------|
|                | Con*                   | 1SW                     | 3SW                     | 5SW                    |        |           |
| Acidobacteria  | 0.01±0.00 <sup>#</sup> | 0.01±0.00               | 0.02±0.01               | 0.04±0.01              | NS     | NS        |
| Actinobacteria | 0.99±0.18 <sup>a</sup> | 0.76±0.10 <sup>ab</sup> | 0.62±0.09 <sup>ab</sup> | 0.50±0.07 <sup>b</sup> | 0.006  | 0.474     |
| Bacteroidetes  | 50.08±2.80             | 43.46±3.54              | 45.93±3.96              | 46.23±3.41             | NS     | NS        |
| Chloroflexi    | 0.03±0.01              | 0.04±0.01               | 0.07±0.03               | 0.02±0.01              | NS     | NS        |
| Cyanobacteria  | 0.10±0.03              | 0.24±0.08               | 0.24±0.04               | 0.34±0.11              | NS     | NS        |
| Fibrobacteres  | 0.03±0.01              | 0.05±0.02               | 0.14±0.05               | 0.09±0.02              | NS     | NS        |
| Firmicutes     | 44.04±2.95             | 53.55±3.59              | 51.76±3.94              | 49.43±3.69             | NS     | NS        |
| Proteobacteria | 3.28±1.16              | 1.09±0.52               | 0.80±0.20               | 2.64±1.36              | NS     | NS        |
| Spirochaetes   | 0.17±0.04              | 0.24±0.07               | 0.10±0.03               | 0.16±0.05              | NS     | NS        |
| Synergistetes  | 0.01±0.00              | 0.01±0.00               | 0.01±0.00               | 0.02±0.01              | NS     | NS        |
| TM7            | 0.79±0.27 <sup>a</sup> | 0.15±0.04 <sup>b</sup>  | 0.05±0.02 <sup>c</sup>  | 0.29±0.09 <sup>b</sup> | 0.058  | 0.004     |
| Tenericutes    | 0.46±0.08 <sup>a</sup> | 0.36±0.05 <sup>ab</sup> | 0.22±0.04 <sup>b</sup>  | 0.23±0.03 <sup>b</sup> | 0.003  | 0.140     |

\* Con: control; 1SW: 1% Tasco<sup>®</sup>; 3SW: 3% Tasco<sup>®</sup>; 5SW: 5% Tasco<sup>®</sup>.

<sup>abc</sup> letters indicates difference among Tasco<sup>®</sup> levels.

<sup>#</sup> numbers shown in percentage.
