# Supplementary material for: Air-Dried Brown Seaweed, Ascophyllum nodosum, Alters the Rumen Microbiome in a Manner That Changes Rumen Fermentation Profiles and Lowers the Prevalence of Foodborne Pathogens
Source: PubMed Central journal article supplement (PMC5793039; doi:10.1128/msphere.00017-18), 2018-01-31
Supplement: sph001182470st2.pdf [file sph001182470st2.pdf]

Table S2

| Proportion                          | Diets                  |                         |                         |                          | Linear | Quadratic |
|-------------------------------------|------------------------|-------------------------|-------------------------|--------------------------|--------|-----------|
|                                     | Con*                   | 1SW                     | 3SW                     | 5SW                      |        |           |
| undefined family of Actinomycetales | 0.00±0.00 <sup>#</sup> | 0.05±0.02               | 0.00±0.00               | 0.00±0.00                | NS     | NS        |
| Coriobacteriaceae                   | 0.94±0.17 <sup>a</sup> | 0.67±0.09 <sup>ab</sup> | 0.56±0.09 <sup>ab</sup> | 0.45±0.07 <sup>b</sup>   | 0.004  | 0.364     |
| Bacteroidaceae                      | 0.07±0.01              | 0.07±0.02               | 0.06±0.02               | 0.02±0.01                | NS     | NS        |
| undefined family of class TM7-1     | 0.51±0.28 <sup>a</sup> | 0.12±0.05 <sup>b</sup>  | 0.01±0.01 <sup>c</sup>  | 0.18±0.09 <sup>b</sup>   | 0.041  | 0.272     |
| undefined family of class TM7-3     | 0.23±0.21              | 0.02±0.01               | 0.01±0.00               | 0.08±0.04                | NS     | NS        |
| undefined family of order EW055     | 0.06±0.02              | 0.00±0.00               | 0.00±0.00               | 0.00±0.00                | NS     | NS        |
| undefined family of Bacteroidales   | 1.16±0.40              | 2.14±0.62               | 1.53±0.70               | 1.90±0.77                | NS     | NS        |
| Prevotellaceae                      | 43.74±3.08             | 32.61±2.64              | 38.22±3.81              | 38.23±3.85               | NS     | NS        |
| Rikenellaceae                       | 0.19±0.10              | 0.20±0.05               | 0.22±0.09               | 0.16±0.04                | NS     | NS        |
| S24_7                               | 1.88±0.56              | 5.34±1.14               | 3.20±0.56               | 2.57±0.70                | NS     | NS        |
| Paraprevotellaceae                  | 2.79±0.62              | 3.12±0.77               | 2.61±0.56               | 2.94±0.42                | NS     | NS        |
| Sphingobacteriaceae                 | 0.22±0.06              | 0.34±0.09               | 0.05±0.01               | 0.36±0.14                | NS     | NS        |
| Anaerolinaceae                      | 0.03±0.01              | 0.03±0.01               | 0.07±0.03               | 0.02±0.01                | NS     | NS        |
| undefined family of order YS2       | 0.00±0.00              | 0.14±0.12               | 0.08±0.04               | 0.22±0.14                | NS     | NS        |
| undefined family of Streptophyta    | 0.17±0.05              | 0.17±0.09               | 0.14±0.03               | 0.08±0.01                | NS     | NS        |
| undefined family of order 258ds10   | 0.00±0.00              | 0.06±0.03               | 0.14±0.07               | 0.09±0.03                | NS     | NS        |
| Paenibacillaceae                    | 0.22±0.07 <sup>a</sup> | 0.08±0.03 <sup>b</sup>  | 0.22±0.08 <sup>a</sup>  | 0.97±0.39 <sup>c</sup>   | 0.007  | 0.069     |
| undefined family of Clostridiales   | 13.18±2.69             | 12.29±4.17              | 8.99±1.37               | 14.99±5.44               | NS     | NS        |
| Christensenellaceae                 | 0.17±0.04              | 0.63±0.23               | 0.12±0.03               | 0.18±0.06                | NS     | NS        |
| Clostridiaceae                      | 0.28±0.07              | 0.80±0.31               | 0.91±0.31               | 1.05±0.50                | NS     | NS        |
| Eubacteriaceae                      | 0.03±0.01              | 0.06±0.02               | 0.06±0.03               | 0.02±0.01                | NS     | NS        |
| Lachnospiraceae                     | 13.18±1.59             | 12.75±1.57              | 11.69±2.62              | 8.03±0.61                | NS     | NS        |
| Peptococcaceae                      | 0.02±0.02              | 0.06±0.03               | 0.03±0.01               | 0.04±0.02                | NS     | NS        |
| Ruminococcaceae                     | 8.85±2.31              | 15.32±2.19              | 12.81±2.62              | 12.04±1.86               | NS     | NS        |
| Veillonellaceae                     | 7.83±1.27 <sup>a</sup> | 9.04±1.58 <sup>ab</sup> | 14.49±1.93 <sup>b</sup> | 10.25±1.48 <sup>ab</sup> | 0.113  | 0.023     |
| Mogibacteriaceae                    | 0.41±0.10              | 0.49±0.08               | 0.54±0.11               | 0.37±0.06                | NS     | NS        |
| Tissierellaceae                     | 0.04±0.01              | 0.13±0.03               | 0.11±0.04               | 0.04±0.01                | NS     | NS        |
| Erysipelotrichaceae                 | 1.24±0.23              | 1.78±0.55               | 1.65±0.42               | 1.21±0.32                | NS     | NS        |
| Hyphomicrobiaceae                   | 0.01±0.00              | 0.08±0.05               | 0.03±0.02               | 0.01±0.00                | NS     | NS        |

|                                |           |           |           |           |    |    |
|--------------------------------|-----------|-----------|-----------|-----------|----|----|
| undefined family of order RF39 | 0.46±0.13 | 0.39±0.06 | 0.22±0.05 | 0.22±0.03 | NS | NS |
| Succinivibrionaceae            | 3.13±1.16 | 0.92±0.49 | 0.68±0.21 | 2.52±1.35 | NS | NS |
| Spirochaetaceae                | 0.16±0.04 | 0.24±0.07 | 0.09±0.03 | 0.16±0.05 | NS | NS |

\* Con: control; 1SW: 1% Tasco<sup>®</sup>; 3SW: 3% Tasco<sup>®</sup>; 5SW: 5% Tasco<sup>®</sup>.

<sup>abc</sup> letters indicates difference among Tasco<sup>®</sup> levels.

<sup>#</sup> numbers shown in percentage.
