# Supplementary material for: Air-Dried Brown Seaweed, Ascophyllum nodosum, Alters the Rumen Microbiome in a Manner That Changes Rumen Fermentation Profiles and Lowers the Prevalence of Foodborne Pathogens
Source: PubMed Central journal article supplement (PMC5793039; doi:10.1128/msphere.00017-18), 2018-01-31
Supplement: sph001182470st3.pdf [file sph001182470st3.pdf]

Table S3

| Proportion                             | Diets                  |                         |                        |                        | Linear | Quadratic |
|----------------------------------------|------------------------|-------------------------|------------------------|------------------------|--------|-----------|
|                                        | Con*                   | 1SW                     | 3SW                    | 5SW                    |        |           |
| <i>Prevotella</i>                      | 43.74±4.43 #           | 35.58±3.11              | 38.22±5.84             | 38.18±6.15             | NS     | NS        |
| undefined genus of Clostridiales       | 11.73±4.34             | 20.70±11.81             | 8.99±1.37              | 14.99±5.44             | NS     | NS        |
| undefined genus of Ruminococcaceae     | 4.36±1.18              | 10.26±4.23              | 5.74±1.62              | 6.92±2.56              | NS     | NS        |
| <i>Ruminococcus</i>                    | 4.25±3.09              | 9.14±3.02               | 6.65±3.29              | 3.81±1.32              | NS     | NS        |
| undefined genus of Veilonellaceae      | 2.83±0.76              | 6.12±2.29               | 6.57±1.91              | 7.50±2.42              | NS     | NS        |
| undefined genus of Lachnospiraceae     | 3.04±0.60              | 5.63±2.55               | 4.27±1.00              | 3.66±0.62              | NS     | NS        |
| undefined genus of family S24-7        | 1.88±0.87              | 5.95±2.01               | 3.20±0.92              | 2.47±1.20              | NS     | NS        |
| <i>Dialister</i>                       | 2.66±1.23              | 3.17±1.49               | 5.43±2.79              | 0.72±0.50              | NS     | NS        |
| YRC22                                  | 2.50±1.09              | 3.52±1.57               | 2.15±0.91              | 2.15±0.74              | NS     | NS        |
| <i>Shuttleworthia</i>                  | 1.19±0.95              | 4.18±3.07               | 2.79±2.70              | 0.30±0.11              | NS     | NS        |
| undefined genus of Succinivibrionaceae | 3.13±2.02              | 0.92±0.81               | 0.68±0.33              | 2.41±2.31              | NS     | NS        |
| undefined genus of Bacteroidales       | 1.16±0.40              | 2.14±0.62               | 1.53±0.70              | 1.90±0.77              | NS     | NS        |
| <i>Butyrivibrio</i>                    | 1.60±0.59              | 1.53±0.65               | 1.47±0.60              | 0.78±0.25              | NS     | NS        |
| <i>Coprococcus</i>                     | 2.77±1.85              | 1.07±0.40               | 0.74±0.20              | 0.75±0.12              | NS     | NS        |
| <i>Roseburia</i>                       | 2.57±1.16 <sup>a</sup> | 0.49±0.12 <sup>b</sup>  | 0.48±0.18 <sup>b</sup> | 0.42±0.21 <sup>b</sup> | 0.020  | 0.102     |
| <i>Lachnospira</i>                     | 0.87±0.37              | 0.92±0.45               | 0.94±0.35              | 0.76±0.44              | NS     | NS        |
| <i>Megasphaera</i>                     | 0.88±0.57              | 0.88±0.60               | 1.14±0.52              | 0.51±0.27              | NS     | NS        |
| <i>Succiniclasticum</i>                | 0.90±0.40              | 0.74±0.27               | 0.59±0.19              | 1.03±0.43              | NS     | NS        |
| <i>Bulleidia</i>                       | 0.60±0.26              | 0.10±0.04               | 0.64±0.21              | 0.73±0.46              | NS     | NS        |
| undefined genus of Coriobacteriaceae   | 0.94±0.20              | 0.84±0.22               | 0.56±0.13              | 0.44±0.10              | NS     | NS        |
| <i>Clostridium</i>                     | 0.26±0.10              | 0.31±0.14               | 0.82±0.37              | 0.96±0.70              | NS     | NS        |
| <i>Dorea</i>                           | 0.51±0.13              | 0.62±0.20               | 0.33±0.06              | 0.71±0.30              | NS     | NS        |
| <i>Eubacterium</i>                     | 0.31±0.11              | 0.73±0.61               | 0.72±0.48              | 0.18±0.07              | NS     | NS        |
| <i>Anaerovibrio</i>                    | 0.24±0.08              | 0.40±0.22               | 0.37±0.13              | 0.51±0.12              | NS     | NS        |
| <i>Prevotella 2</i>                    | 0.16±0.06              | 0.30±0.13               | 0.26±0.18              | 0.76±0.39              | NS     | NS        |
| undefined genus of Christensenellaceae | 0.16±0.05              | 0.95±0.56               | 0.11±0.04              | 0.18±0.08              | NS     | NS        |
| undefined genus of Paenibacillaceae    | 0.21±0.09 <sup>a</sup> | 0.07±0.05 <sup>a</sup>  | 0.19±0.10 <sup>a</sup> | 0.91±0.60 <sup>b</sup> | 0.113  | 0.023     |
| <i>Faecalibacterium</i>                | 0.01±0.01              | 0.11±0.10               | 0.18±0.11              | 1.03±1.00              | NS     | NS        |
| undefined genus of order RF39          | 0.46±0.13 <sup>a</sup> | 0.39±0.06 <sup>ab</sup> | 0.22±0.05 <sup>b</sup> | 0.22±0.03 <sup>b</sup> | 0.359  | 0.018     |

|                                        |                        |                        |                        |                        |       |       |
|----------------------------------------|------------------------|------------------------|------------------------|------------------------|-------|-------|
| <i>Mogibacterium</i>                   | 0.24±0.10              | 0.47±0.29              | 0.31±0.15              | 0.18±0.05              | NS    | NS    |
| <i>Acidaminococcus</i>                 | 0.31±0.12              | 0.29±0.11              | 0.36±0.15              | 0.19±0.10              | NS    | NS    |
| <i>Syntrophococcus</i>                 | 0.18±0.04 <sup>a</sup> | 0.52±0.13 <sup>b</sup> | 0.16±0.04 <sup>a</sup> | 0.14±0.02 <sup>a</sup> | 0.010 | 0.011 |
| <i>Oscillospira</i>                    | 0.22±0.07              | 0.35±0.18              | 0.21±0.07              | 0.21±0.06              | NS    | NS    |
| undefined genus of Sphingobacteriaceae | 0.22±0.08              | 0.35±0.16              | 0.05±0.01              | 0.37±0.22              | NS    | NS    |
| undefined genus of Mogibacteriaceae    | 0.18±0.05              | 0.32±0.13              | 0.24±0.06              | 0.19±0.04              | NS    | NS    |
| Blvii28                                | 0.19±0.14              | 0.29±0.13              | 0.22±0.16              | 0.17±0.07              | NS    | NS    |
| undefined genus of class TM7-1         | 0.51±0.28 <sup>a</sup> | 0.12±0.05 <sup>b</sup> | 0.01±0.01 <sup>c</sup> | 0.18±0.09 <sup>b</sup> | 0.041 | 0.272 |
| <i>Anaerostipes</i>                    | 0.20±0.10              | 0.31±0.18              | 0.11±0.05              | 0.13±0.09              | NS    | NS    |
| <i>Treponema</i>                       | 0.16±0.07              | 0.29±0.13              | 0.09±0.04              | 0.17±0.07              | NS    | NS    |
| <i>Blautia</i>                         | 0.09±0.02              | 0.16±0.06              | 0.17±0.03              | 0.28±0.11              | NS    | NS    |
| undefined genus of Clostridiaceae      | 0.01±0.00              | 0.56±0.52              | 0.06±0.03              | 0.06±0.03              | NS    | NS    |
| PSB-M-3                                | 0.19±0.06              | 0.14±0.07              | 0.16±0.07              | 0.10±0.04              | NS    | NS    |
| CF231                                  | 0.09±0.05              | 0.12±0.04              | 0.16±0.09              | 0.18±0.06              | NS    | NS    |
| <i>Ruminococcus 2</i>                  | 0.11±0.03              | 0.10±0.05              | 0.19±0.06              | 0.13±0.04              | NS    | NS    |
| undefined genus of order YS2           | 0.02±0.01              | 0.14±0.12              | 0.08±0.04              | 0.22±0.14              | NS    | NS    |
| undefined genus of order Streptophyta  | 0.07±0.03              | 0.17±0.09              | 0.14±0.03              | 0.08±0.01              | NS    | NS    |
| undefined genus of class TM7-3         | 0.23±0.21              | 0.02±0.01              | 0.01±0.00              | 0.08±0.04              | NS    | NS    |
| undefined genus of order 258ds10       | 0.03±0.01              | 0.06±0.03              | 0.14±0.07              | 0.09±0.03              | NS    | NS    |
| undefined genus of Erysipelotrichaceae | 0.08±0.04              | 0.08±0.05              | 0.08±0.05              | 0.04±0.02              | NS    | NS    |
| <i>Parvimonas</i>                      | 0.02±0.01              | 0.08±0.06              | 0.07±0.06              | 0.02±0.02              | NS    | NS    |
| undefined genus of order EW055         | 0.06±0.02              | 0.00±0.00              | 0.00±0.00              | 0.00±0.00              | NS    | NS    |
| <i>Anaerolinea</i>                     | 0.00±0.00              | 0.00±0.00              | 0.07±0.04              | 0.00±0.00              | NS    | NS    |
| undefined genus of Actinomycetales     | 0.00±0.00              | 0.05±0.02              | 0.00±0.00              | 0.00±0.00              | NS    | NS    |
| <i>Sharpea</i>                         | 0.02±0.01              | 0.00±0.00              | 0.01±0.01              | 0.07±0.04              | NS    | NS    |

\* Con: control; 1SW: 1% Tasco<sup>®</sup>; 3SW: 3% Tasco<sup>®</sup>; 5SW: 5% Tasco<sup>®</sup>.

<sup>abc</sup> letters indicates difference among Tasco<sup>®</sup> levels.

# numbers shown in percentage.
