# Supplementary material for: Air-Dried Brown Seaweed, Ascophyllum nodosum, Alters the Rumen Microbiome in a Manner That Changes Rumen Fermentation Profiles and Lowers the Prevalence of Foodborne Pathogens
Source: PubMed Central journal article supplement (PMC5793039; doi:10.1128/msphere.00017-18), 2018-01-31
Supplement: sph001182470st4.pdf [file sph001182470st4.pdf]

Table S4

| Proportion                           | Diets                   |            |           |            | Linear | Quadratic |
|--------------------------------------|-------------------------|------------|-----------|------------|--------|-----------|
|                                      | Con*                    | 1SW        | 3SW       | 5SW        |        |           |
| <b>Bacteria</b>                      |                         |            |           |            |        |           |
| undefined sp. of Clostridiales       | 11.73±2.50 <sup>#</sup> | 12.29±2.40 | 8.99±0.98 | 15.14±3.20 | NS     | NS        |
| undefined sp. of Ruminococcaceae     | 4.6±0.76                | 7.14±1.11  | 5.74±1.03 | 6.89±1.51  | NS     | NS        |
| <i>Ruminococcus</i> sp.              | 3.76±1.73               | 7.01±1.74  | 5.73±1.92 | 3.30±0.82  | NS     | NS        |
| <i>Prevotella melaninogenica</i>     | 6.40±1.92               | 2.15±0.54  | 2.58±0.71 | 2.06±0.74  | NS     | NS        |
| undefined sp. of Lachnospiraceae     | 3.04±0.40               | 3.90±0.79  | 4.27±0.60 | 3.54±0.35  | NS     | NS        |
| undefined sp. of family S24-7        | 1.88±0.56               | 5.34±1.14  | 3.20±0.56 | 2.57±0.70  | NS     | NS        |
| <i>Dialister</i> sp.                 | 2.66±0.73               | 2.70±0.85  | 5.43±1.56 | 0.75±0.29  | NS     | NS        |
| undefined sp. of genera YRC22        | 2.50±0.60               | 2.62±0.71  | 2.15±0.56 | 1.97±0.41  | NS     | NS        |
| <i>Shuttleworthia</i> sp.            | 1.19±0.59               | 4.16±1.73  | 2.79±1.66 | 0.29±0.08  | NS     | NS        |
| undefined sp. of Succinivibrionaceae | 3.13±1.16               | 0.92±0.49  | 0.68±0.21 | 2.52±1.35  | NS     | NS        |
| undefined sp. of Bacteroidales       | 1.16±0.23               | 1.71±0.25  | 1.53±0.40 | 1.89±0.45  | NS     | NS        |
| <i>Butyrivibrio</i> sp.              | 1.60±0.43               | 1.04±0.15  | 1.47±0.35 | 0.79±0.16  | NS     | NS        |
| <i>Lachnospira</i> sp.               | 0.87±0.21               | 0.91±0.26  | 0.94±0.22 | 0.80±0.25  | NS     | NS        |
| <i>Megasphaera</i> sp.               | 0.88±0.35               | 0.87±0.39  | 1.14±0.35 | 0.53±0.18  | NS     | NS        |
| <i>Succiniclasticum</i> sp.          | 0.90±0.26               | 0.55±0.10  | 0.59±0.12 | 1.00±0.27  | NS     | NS        |
| <i>Ruminococcus flavefaciens</i>     | 0.49±0.08               | 0.82±0.18  | 0.92±0.18 | 0.56±0.07  | NS     | NS        |
| <i>Bulleidia</i> sp.                 | 0.60±0.18               | 0.77±0.23  | 0.61±0.13 | 0.75±0.28  | NS     | NS        |
| <i>Clostridium</i> sp.               | 0.26±0.07               | 0.20±0.04  | 0.82±0.28 | 0.97±0.48  | NS     | NS        |
| <i>Dorea</i> sp.                     | 0.49±0.09               | 0.55±0.12  | 0.33±0.04 | 0.70±0.19  | NS     | NS        |
| <i>Eubacterium dolichum</i>          | 0.31±0.08               | 0.73±0.34  | 0.72±0.27 | 0.19±0.04  | NS     | NS        |
| <i>Prevotella</i> sp. 2              | 0.16±0.04               | 0.30±0.07  | 0.26±0.11 | 0.76±0.26  | NS     | NS        |
| <i>Anaerovibrio</i> sp.              | 0.24±0.06               | 0.25±0.05  | 0.37±0.08 | 0.50±0.08  | NS     | NS        |
| undefined sp. of Paenibacillaceae    | 0.21±0.07               | 0.07±0.03  | 0.19±0.07 | 0.95±0.39  | NS     | NS        |
| <i>Faecalibacterium prausnitzii</i>  | 0.01±0.00               | 0.11±0.09  | 0.18±0.07 | 1.08±0.59  | NS     | NS        |
| <i>Acidaminococcus</i> sp.           | 0.31±0.08               | 0.29±0.09  | 0.36±0.10 | 0.20±0.06  | NS     | NS        |
| undefined sp. of Christensenellaceae | 0.16±0.04               | 0.62±0.23  | 0.11±0.03 | 0.18±0.06  | NS     | NS        |
| undefined sp. of Sphingobacteriaceae | 0.22±0.06               | 0.34±0.09  | 0.05±0.01 | 0.36±0.13  | NS     | NS        |

|                                     |           |           |           |           |    |    |
|-------------------------------------|-----------|-----------|-----------|-----------|----|----|
| <i>Mogibacterium</i> sp.            | 0.24±0.07 | 0.27±0.06 | 0.31±0.09 | 0.18±0.03 | NS | NS |
| <i>Syntrophococcus sucromutans</i>  | 0.18±0.03 | 0.42±0.07 | 0.16±0.03 | 0.14±0.02 | NS | NS |
| <i>Oscillospira</i> sp.             | 0.22±0.05 | 0.22±0.05 | 0.21±0.05 | 0.21±0.04 | NS | NS |
| undefined sp. of Mogibacteriaceae   | 0.18±0.04 | 0.22±0.03 | 0.24±0.04 | 0.19±0.03 | NS | NS |
| undefined sp. of class TM7-1        | 0.51±0.20 | 0.11±0.04 | 0.01±0.00 | 0.19±0.06 | NS | NS |
| undefined sp. of genera Blvii28     | 0.19±0.10 | 0.20±0.05 | 0.22±0.09 | 0.16±0.04 | NS | NS |
| <i>Anaerostipes</i> sp.             | 0.20±0.06 | 0.31±0.10 | 0.11±0.03 | 0.14±0.05 | NS | NS |
| undefined sp. of Clostridiaceae     | 0.01±0.00 | 0.55±0.29 | 0.06±0.02 | 0.06±0.02 | NS | NS |
| <i>Treponema</i> sp.                | 0.16±0.04 | 0.24±0.07 | 0.09±0.03 | 0.16±0.05 | NS | NS |
| undefined sp. of order YS2          | 0.02±0.01 | 0.14±0.08 | 0.08±0.03 | 0.23±0.11 | NS | NS |
| undefined sp. of genera CF231       | 0.09±0.01 | 0.12±0.02 | 0.16±0.02 | 0.25±0.06 | NS | NS |
| undefined sp. of genera PSB-M-3     | 0.19±0.04 | 0.14±0.06 | 0.16±0.05 | 0.11±0.03 | NS | NS |
| <i>Parvimonas</i> sp.               | 0.02±0.01 | 0.07±0.03 | 0.07±0.03 | 0.02±0.01 | NS | NS |
| <i>Ruminococcus gnavus</i>          | 0.11±0.03 | 0.09±0.03 | 0.19±0.05 | 0.13±0.03 | NS | NS |
| undefined sp. of genera Blvii28     | 0.13±0.03 | 0.06±0.02 | 0.11±0.04 | 0.09±0.03 | NS | NS |
| undefined sp. of Streptophyta       | 0.07±0.02 | 0.10±0.03 | 0.14±0.03 | 0.08±0.02 | NS | NS |
| undefined sp. of order 258ds10      | 0.03±0.01 | 0.05±0.02 | 0.14±0.05 | 0.09±0.02 | NS | NS |
| undefined sp. of class TM7-3        | 0.23±0.14 | 0.02±0.01 | 0.01±0.00 | 0.08±0.03 | NS | NS |
| undefined sp. o Erysipelotrichaceae | 0.08±0.03 | 0.05±0.01 | 0.08±0.03 | 0.05±0.01 | NS | NS |
| <i>Anaerolinea</i> sp.              | 0.03±0.01 | 0.03±0.01 | 0.07±0.03 | 0.02±0.01 | NS | NS |
| <i>Eubacterium</i> sp.              | 0.03±0.01 | 0.06±0.02 | 0.06±0.03 | 0.02±0.00 | NS | NS |
| undefined sp. of order EW055        | 0.06±0.02 | 0.02±0.01 | 0.03±0.02 | 0.02±0.01 | NS | NS |
| undefined sp. of genera 5-7N15      | 0.05±0.01 | 0.04±0.01 | 0.04±0.02 | 0.01±0.00 | NS | NS |
| <i>Moryella</i> sp.                 | 0.02±0.01 | 0.02±0.01 | 0.04±0.01 | 0.03±0.01 | NS | NS |
| <i>Paraprevotella</i> sp.           | 0.03±0.01 | 0.04±0.01 | 0.03±0.01 | 0.02±0.01 | NS | NS |
| undefined sp. of Hyphomicrobiaceae  | 0.00±0.00 | 0.08±0.04 | 0.03±0.02 | 0.00±0.00 | NS | NS |
| <i>Sharpea</i> sp.                  | 0.02±0.01 | 0.01±0.00 | 0.01±0.00 | 0.08±0.03 | NS | NS |
| undefined sp. of Comamonadaceae     | 0.00±0.00 | 0.03±0.01 | 0.01±0.01 | 0.04±0.02 | NS | NS |
| undefined sp. of Peptococcaceae     | 0.02±0.01 | 0.03±0.01 | 0.02±0.01 | 0.03±0.01 | NS | NS |
| <i>Bulleidia</i> p-1630-c5          | 0.01±0.00 | 0.04±0.01 | 0.03±0.01 | 0.00±0.00 | NS | NS |
| <i>Bacteroides</i> sp.              | 0.02±0.01 | 0.03±0.01 | 0.01±0.00 | 0.01±0.01 | NS | NS |
| <i>Tissierella</i> sp.              | 0.02±0.01 | 0.05±0.02 | 0.02±0.01 | 0.00±0.00 | NS | NS |

|                                       |           |           |           |           |    |    |
|---------------------------------------|-----------|-----------|-----------|-----------|----|----|
| undefined sp. of Actinomycetales      | 0.02±0.01 | 0.04±0.01 | 0.02±0.01 | 0.02±0.01 | NS | NS |
| undefined sp. of Bacillales           | 0.02±0.01 | 0.02±0.01 | 0.01±0.01 | 0.04±0.01 | NS | NS |
| undefined sp. of Paraprevotellaceae   | 0.00±0.00 | 0.06±0.03 | 0.02±0.01 | 0.00±0.00 | NS | NS |
| <i>Ethanoligenens</i> sp.             | 0.01±0.00 | 0.02±0.01 | 0.05±0.02 | 0.01±0.01 | NS | NS |
| <i>Dorea formicigenerans</i>          | 0.03±0.02 | 0.02±0.01 | 0.00±0.00 | 0.02±0.01 | NS | NS |
| undefined sp. of genera p-75-a5       | 0.02±0.01 | 0.01±0.00 | 0.02±0.01 | 0.02±0.01 | NS | NS |
| undefined sp. of Pirellulaceae        | 0.01±0.01 | 0.02±0.01 | 0.01±0.00 | 0.02±0.01 | NS | NS |
| undefined sp. of Alphaproteobacteria  | 0.03±0.02 | 0.01±0.00 | 0.02±0.01 | 0.00±0.00 | NS | NS |
| undefined sp. of Acidimicrobiales     | 0.01±0.00 | 0.02±0.01 | 0.02±0.01 | 0.01±0.00 | NS | NS |
| <i>Erysipelothrix</i>                 | 0.00±0.00 | 0.03±0.01 | 0.02±0.01 | 0.01±0.00 | NS | NS |
| <i>Selenomonas</i> sp.                | 0.00±0.00 | 0.01±0.00 | 0.02±0.01 | 0.03±0.02 | NS | NS |
| <i>Paenibacillus</i> sp.              | 0.01±0.00 | 0.01±0.00 | 0.02±0.01 | 0.02±0.01 | NS | NS |
| <i>Prevotella</i> sp. 1               | 0.01±0.00 | 0.02±0.01 | 0.01±0.00 | 0.02±0.01 | NS | NS |
| <i>Oribacterium</i> sp.               | 0.01±0.01 | 0.01±0.01 | 0.01±0.01 | 0.01±0.01 | NS | NS |
| <i>Gracilibacter</i> sp.              | 0.01±0.01 | 0.03±0.02 | 0.01±0.01 | 0.00±0.00 | NS | NS |
| undefined sp. of order CCU21          | 0.00±0.00 | 0.01±0.00 | 0.01±0.00 | 0.03±0.01 | NS | NS |
| undefined sp. of Acidaminobacteraceae | 0.00±0.00 | 0.02±0.01 | 0.01±0.01 | 0.01±0.00 | NS | NS |
| undefined sp. of genera SMB53         | 0.00±0.00 | 0.02±0.01 | 0.01±0.00 | 0.00±0.00 | NS | NS |
| undefined sp. of family RF16          | 0.01±0.00 | 0.02±0.01 | 0.00±0.00 | 0.00±0.00 | NS | NS |
| <i>Veillonella</i> sp.                | 0.01±0.00 | 0.01±0.00 | 0.01±0.01 | 0.01±0.01 | NS | NS |
| <i>Parabacteroides</i> sp.            | 0.00±0.00 | 0.00±0.00 | 0.02±0.01 | 0.01±0.01 | NS | NS |
| undefined sp. of Alicyclobacillaceae  | 0.01±0.01 | 0.01±0.00 | 0.01±0.00 | 0.01±0.00 | NS | NS |
| <i>Tindallia</i> sp.                  | 0.00±0.00 | 0.01±0.00 | 0.02±0.01 | 0.01±0.00 | NS | NS |
| undefined sp. of Stramenopiles        | 0.00±0.00 | 0.00±0.00 | 0.01±0.00 | 0.02±0.01 | NS | NS |
| <i>Bifidobacterium</i> sp.            | 0.01±0.01 | 0.01±0.00 | 0.01±0.00 | 0.01±0.00 | NS | NS |
| <i>Blautia</i> sp.                    | 0.01±0.00 | 0.00±0.00 | 0.01±0.00 | 0.02±0.01 | NS | NS |
| <i>Alicyclobacillus</i> sp.           | 0.00±0.00 | 0.02±0.01 | 0.01±0.01 | 0.00±0.00 | NS | NS |
| <i>Christensenella</i> sp.            | 0.00±0.00 | 0.01±0.01 | 0.01±0.00 | 0.01±0.00 | NS | NS |
| undefined sp. of Microthrixaceae      | 0.00±0.00 | 0.01±0.01 | 0.01±0.00 | 0.01±0.00 | NS | NS |
| <i>Lactobacillus</i> sp.              | 0.00±0.00 | 0.01±0.00 | 0.02±0.02 | 0.00±0.00 | NS | NS |
| undefined sp. of Sva0725              | 0.00±0.00 | 0.00±0.00 | 0.01±0.01 | 0.01±0.01 | NS | NS |
| undefined sp. of genera HA73          | 0.00±0.00 | 0.01±0.00 | 0.01±0.00 | 0.01±0.01 | NS | NS |

|                                        |            |             |             |            |    |    |
|----------------------------------------|------------|-------------|-------------|------------|----|----|
| undefined sp. of genera TG5            | 0.01±0.00  | 0.00±0.00   | 0.01±0.00   | 0.00±0.00  | NS | NS |
| <i>Desulfobulbus</i> sp.               | 0.00±0.00  | 0.01±0.00   | 0.01±0.01   | 0.01±0.01  | NS | NS |
| <i>Pedobacteri</i> sp.                 | 0.00±0.00  | 0.00±0.00   | 0.01±0.00   | 0.01±0.00  | NS | NS |
| <i>Dehalobacterium</i> sp.             | 0.00±0.00  | 0.01±0.00   | 0.01±0.01   | 0.00±0.00  | NS | NS |
| <i>Peptococcus</i> sp.                 | 0.00±0.00  | 0.00±0.00   | 0.01±0.00   | 0.01±0.01  | NS | NS |
| <i>Sphaerochaeta</i> sp.               | 0.01±0.01  | 0.01±0.00   | 0.00±0.00   | 0.00±0.00  | NS | NS |
| <i>Coprobacillus</i>                   | 0.01±0.00  | 0.01±0.01   | 0.00±0.00   | 0.01±0.01  | NS | NS |
| <i>Fusobacterium</i> sp.               | 0.00±0.00  | 0.00±0.00   | 0.02±0.01   | 0.00±0.00  | NS | NS |
| <i>Alkaliphilus</i> sp.                | 0.00±0.00  | 0.01±0.00   | 0.00±0.00   | 0.01±0.01  | NS | NS |
| <i>Tepidimicrobium</i> sp.             | 0.00±0.00  | 0.00±0.00   | 0.01±0.01   | 0.00±0.00  | NS | NS |
| <b>Archaea</b>                         |            |             |             |            |    |    |
| <i>Methanobrevibacter gottschalkii</i> | 44.14±5.12 | 39.52±4.11  | 39.10±5.03  | 40.24±3.46 | NS | NS |
| <i>Methanobrevibacter ruminantium</i>  | 9.94±2.04  | 22.56±3.76  | 15.84±3.61  | 13.40±2.77 | NS | NS |
| <i>Methanobrevibacter wolinii</i>      | 12.07±4.59 | 5.65±2.85   | 7.11±3.84   | 12.61±4.89 | NS | NS |
| <i>Methanosphaera</i> sp.              | 33.18±3.17 | 25.86±4.19  | 36.68±3.65  | 27.60±2.64 | NS | NS |
| undefined sp. of Methanopasmatales     | 0.67±0.28  | 6.39±3.06   | 1.26±0.51   | 6.14±2.08  | NS | NS |
| <b>Protozoa</b>                        |            |             |             |            |    |    |
| <i>Polyplastron</i> sp.                | 9.76±2.29  | 13.84±3.59  | 13.23±3.55  | 19.87±2.59 | NS | NS |
| <i>Isotricha</i> sp. 1                 | 2.01±0.90  | 3.03±1.32   | 1.35±0.48   | 3.71±1.23  | NS | NS |
| <i>Isotricha</i> sp. 2                 | 69.1±7.08  | 58.85±10.47 | 57.28±11.16 | 38.66±7.96 | NS | NS |

\* Con: control; 1SW: 1% Tasco<sup>®</sup>; 3SW: 3% Tasco<sup>®</sup>; 5SW: 5% Tasco<sup>®</sup>.

<sup>abc</sup> letters indicates difference among Tasco<sup>®</sup> levels.

# numbers shown in percentage.
