# Supplementary material for: Air-Dried Brown Seaweed, Ascophyllum nodosum, Alters the Rumen Microbiome in a Manner That Changes Rumen Fermentation Profiles and Lowers the Prevalence of Foodborne Pathogens
Source: PubMed Central journal article supplement (PMC5793039; doi:10.1128/msphere.00017-18), 2018-01-31
Supplement: sph001182470st5.pdf [file sph001182470st5.pdf]

Table S5

| Microbial phylotype     | Function                                              | Correlation coefficient | P      |
|-------------------------|-------------------------------------------------------|-------------------------|--------|
| <b>Bacterial family</b> |                                                       |                         |        |
| Coriobacteriaceae       | Tyrosine metabolism                                   | 0.4177                  | <0.001 |
|                         | Fructose and mannose metabolism                       | 0.4779                  | <0.001 |
|                         | Glycolysis / Gluconeogenesis                          | 0.4194                  | <0.001 |
|                         | Pentose phosphate pathway                             | 0.4812                  | <0.001 |
|                         | Propanoate metabolism                                 | 0.4224                  | <0.001 |
|                         | Pyruvate metabolism                                   | 0.3970                  | <0.001 |
|                         | Starch and sucrose metabolism                         | 0.2172                  | 0.035  |
|                         | Carbon fixation in photosynthetic organisms           | 0.2997                  | 0.003  |
|                         | Methane metabolism                                    | 0.2257                  | 0.028  |
|                         | Fatty acid biosynthesis                               | 0.3266                  | 0.001  |
|                         | D-Alanine metabolism                                  | 0.2681                  | 0.009  |
|                         | Biosynthesis of ansamycins                            | 0.3284                  | 0.001  |
|                         | Tetracycline biosynthesis                             | 0.3923                  | <0.001 |
|                         | Benzoate degradation                                  | 0.4397                  | <0.001 |
|                         | Chloroalkane and chloroalkene degradation             | 0.4059                  | <0.001 |
|                         | Naphthalene degradation                               | 0.3311                  | 0.001  |
|                         | Polycyclic aromatic hydrocarbon degradation           | 0.2638                  | 0.001  |
| Paenibacillaceae        | Glycolysis / Gluconeogenesis                          | 0.2100                  | 0.041  |
| Veillonellaceae         | Amino acid related enzymes                            | 0.4153                  | <0.001 |
|                         | Lysine degradation                                    | 0.2491                  | 0.015  |
|                         | Valine leucine and isoleucine degradation             | 0.3490                  | <0.001 |
|                         | Novobiocin biosynthesis                               | 0.3552                  | <0.001 |
|                         | Tropane piperidine and pyridine alkaloid biosynthesis | 0.2924                  | 0.004  |
| <b>Bacterial genus</b>  |                                                       |                         |        |
| <i>Roseburia</i>        | Phenylpropanoid biosynthesis                          | 0.3854                  | <0.001 |
|                         | Glyoxylate and dicarboxylate metabolism               | 0.2371                  | 0.021  |
|                         | Starch and sucrose metabolism                         | 0.3474                  | <0.001 |
|                         | Photosynthesis                                        | 0.4501                  | <0.001 |
|                         | Photosynthesis proteins                               | 0.4358                  | <0.001 |
|                         | Sulfur metabolism                                     | 0.5142                  | <0.001 |
|                         | Glycerophospholipid metabolism                        | 0.5878                  | <0.001 |
|                         | Biotin metabolism                                     | 0.3576                  | <0.001 |
|                         | Porphyrin and chlorophyll metabolism                  | 0.3808                  | <0.001 |
|                         | Riboflavin metabolism                                 | 0.2096                  | 0.042  |
| Thiamine metabolism     | 0.5958                                                | <0.001                  |        |

|                                     |                                             |         |        |
|-------------------------------------|---------------------------------------------|---------|--------|
|                                     | Cyanoamino acid metabolism                  | 0.3104  | 0.002  |
|                                     | Selenocompound metabolism                   | 0.4166  | <0.001 |
|                                     | Biosynthesis of ansamycins                  | 0.4243  | <0.001 |
|                                     | Glutamatergic synapse                       | 0.7122  | <0.001 |
| undefined genus of Paenibacillaceae | Glycolysis / Gluconeogenesis                | 0.2109  | 0.040  |
| undefined genus of order RF39       | Streptomycin biosynthesis                   | 0.2294  | 0.025  |
|                                     | Amino sugar and nucleotide sugar metabolism | 0.2154  | 0.036  |
|                                     | Polyketide sugar unit biosynthesis          | 0.2614  | 0.011  |
| <b>Archaeal species</b>             |                                             |         |        |
| undefined sp. of Methanopasmatales  | Lysine degradation                          | 0.3558  | <0.001 |
|                                     | Phenylpropanoid biosynthesis                | -0.2665 | 0.009  |
|                                     | Butanoate metabolism                        | 0.3069  | 0.003  |
