# Supplementary material for: Air-Dried Brown Seaweed, Ascophyllum nodosum, Alters the Rumen Microbiome in a Manner That Changes Rumen Fermentation Profiles and Lowers the Prevalence of Foodborne Pathogens
Source: PubMed Central journal article supplement (PMC5793039; doi:10.1128/msphere.00017-18), 2018-01-31
Supplement: sph001182470st6.pdf [file sph001182470st6.pdf]

Table S6<sup>a</sup>

| Species 1 | Species 2 | sp1-inc* | sp2-inc | obs-cooccur | prob-cooccur | exp-cooccur | p-lt | p-gt |
|-----------|-----------|----------|---------|-------------|--------------|-------------|------|------|
| O26_ru    | O157_ru   | 2        | 24      | 1           | 0.047        | 1.5         | 0.44 | 0.94 |
| O45_ru    | O103_ru   | 12       | 12      | 6           | 0.141        | 4.5         | 0.93 | 0.22 |
| O45_ru    | O111_ru   | 12       | 12      | 4           | 0.141        | 4.5         | 0.50 | 0.77 |
| O45_ru    | O121_ru   | 12       | 7       | 5           | 0.082        | 2.6         | 0.99 | 0.05 |
| O45_ru    | O145_ru   | 12       | 6       | 2           | 0.070        | 2.2         | 0.60 | 0.75 |
| O45_ru    | O157_ru   | 12       | 24      | 11          | 0.281        | 9           | 0.99 | 0.10 |
| O45_ru    | O26_fe    | 12       | 4       | 2           | 0.047        | 1.5         | 0.86 | 0.48 |
| O45_ru    | O45_fe    | 12       | 4       | 3           | 0.047        | 1.5         | 0.99 | 0.14 |
| O45_ru    | O121_fe   | 12       | 3       | 1           | 0.035        | 1.1         | 0.69 | 0.77 |
| O103_ru   | O111_ru   | 12       | 12      | 7           | 0.141        | 4.5         | 0.99 | 0.07 |
| O103_ru   | O121_ru   | 12       | 7       | 4           | 0.082        | 2.6         | 0.95 | 0.22 |
| O103_ru   | O145_ru   | 12       | 6       | 1           | 0.070        | 2.2         | 0.25 | 0.96 |
| O103_ru   | O157_ru   | 12       | 24      | 9           | 0.281        | 9           | 0.66 | 0.67 |
| O103_ru   | O26_fe    | 12       | 4       | 1           | 0.047        | 1.5         | 0.52 | 0.87 |
| O103_ru   | O45_fe    | 12       | 4       | 1           | 0.047        | 1.5         | 0.52 | 0.87 |
| O103_ru   | O121_fe   | 12       | 3       | 0           | 0.035        | 1.1         | 0.23 | 1.00 |
| O111_ru   | O121_ru   | 12       | 7       | 4           | 0.082        | 2.6         | 0.95 | 0.22 |
| O111_ru   | O145_ru   | 12       | 6       | 2           | 0.070        | 2.2         | 0.60 | 0.75 |
| O111_ru   | O157_ru   | 12       | 24      | 9           | 0.281        | 9           | 0.66 | 0.67 |
| O111_ru   | O26_fe    | 12       | 4       | 3           | 0.047        | 1.5         | 0.99 | 0.14 |
| O111_ru   | O45_fe    | 12       | 4       | 2           | 0.047        | 1.5         | 0.86 | 0.48 |
| O111_ru   | O121_fe   | 12       | 3       | 0           | 0.035        | 1.1         | 0.23 | 1.00 |
| O121_ru   | O145_ru   | 7        | 6       | 0           | 0.041        | 1.3         | 0.20 | 1.00 |
| O121_ru   | O157_ru   | 7        | 24      | 6           | 0.164        | 5.2         | 0.90 | 0.42 |
| O145_ru   | O157_ru   | 6        | 24      | 6           | 0.141        | 4.5         | 1.00 | 0.15 |
| O157_ru   | O26_fe    | 24       | 4       | 4           | 0.094        | 3           | 1.00 | 0.30 |
| O157_ru   | O45_fe    | 24       | 4       | 3           | 0.094        | 3           | 0.70 | 0.75 |
| O157_ru   | O103_fe   | 24       | 2       | 2           | 0.047        | 1.5         | 1.00 | 0.56 |
| O157_ru   | O111_fe   | 24       | 2       | 2           | 0.047        | 1.5         | 1.00 | 0.56 |
| O157_ru   | O121_fe   | 24       | 3       | 3           | 0.070        | 2.2         | 1.00 | 0.41 |

<sup>a</sup> Co-occurrence coefficient and probability would only be calculated by the program when O-serotype being observed for at least 2 times in one site while more than 2 times in the other site.  
\* sp1-inc: Number of sites (or samples) that have species 1; sp2-inc: Number of sites that have species 2; obs-cooccur: Observed number of sites having both species; prob-cooccur: Probability that both species occur at a site; exp-cooccur: Expected number of sites having both species; p-lt: Probability that the two species would co-occur at a frequency less than the observed number of co-occurrence sites if the two species were distributed randomly (independently) of one another; p-gt: Probability of co-occurrence at a frequency greater than the observed frequency.
